# Supplementary material
Source: publisher figshare collection journal article supplement (https://karger.figshare.com/articles/dataset/_/5125957)
Supplement: Supplementary file 1 [file 1 › 000357219_sm_Figures.pdf]

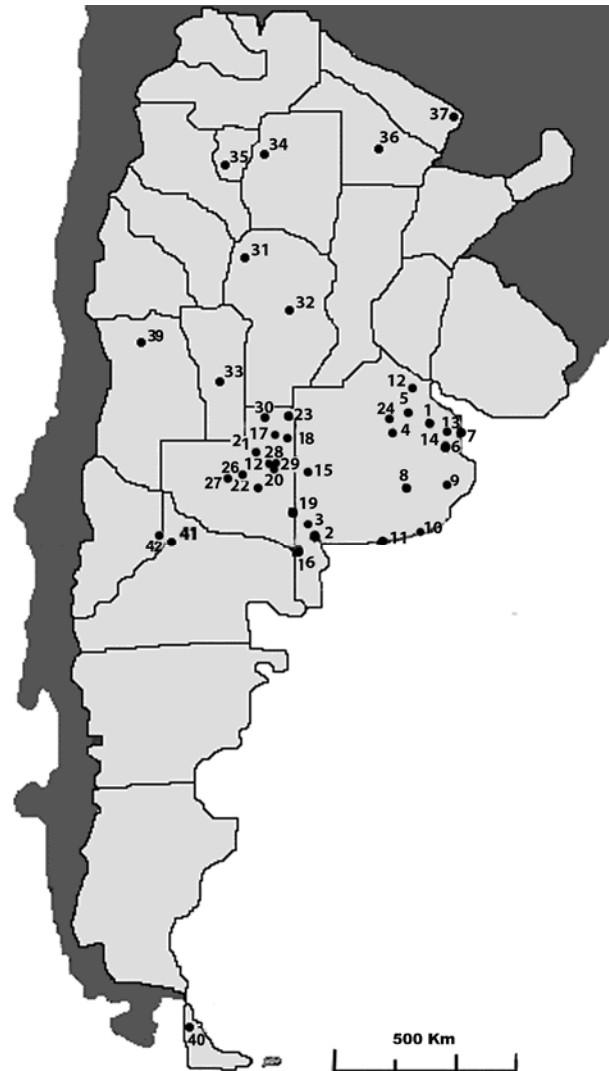

**Fig. 1.** Map showing the geographical distribution of sample collection sites.

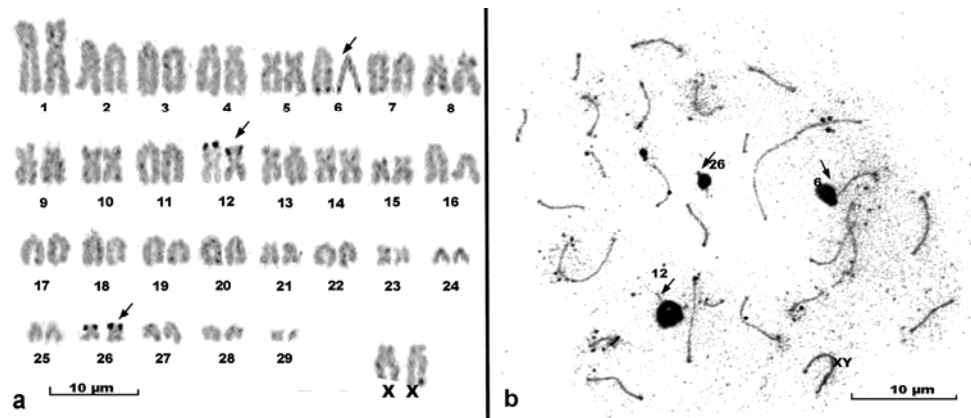

**Fig. 2.** a) Karyotype of *C. villosus* showing the location of the nucleolar organiser in a mitotic metaphase of a female specimen; b) The three NOR-bearing SCs of *C. villosus*.
