# Supplementary material
Source: publisher figshare collection journal article supplement (https://karger.figshare.com/articles/dataset/_/5125957)
Supplement: Supplementary file 1 [file 1 › 000357219_sm_Table.pdf]

**Table 1.** List of analysed samples, including type of study and collection sites.

| Locality |                      | n°  | Sex |     | Latitude      | Longitude      | technique/staining |     |     |     |      |        |
|----------|----------------------|-----|-----|-----|---------------|----------------|--------------------|-----|-----|-----|------|--------|
|          |                      |     | ♂   | ♀   |               |                | Giemsa             | BG  | BC  | Nor | SCs* | MI/MII |
| 1        | Loma Verde           | 40  | 23  | 17  | 35° 16' 40" S | 58° 24' 23" W  | 40                 | 20  | 20  | 10  | 2    | 2      |
| 2        | Bahía Blanca         | 34  | 17  | 17  | 38° 37' 54" S | 62° 19' 51" W  | 34                 | 10  | 12  | 4   |      |        |
| 3        | Nueva Roma           | 20  | 11  | 9   | 38° 32' 60" S | 62° 37' 59" W  | 20                 | 10  | 10  | 1   | 1    | 1      |
| 4        | Saladillo            | 20  | 16  | 4   | 35° 38' 11" S | 59° 46' 43" W  | 20                 | 10  | 10  | 1   | 1    | 1      |
| 5        | Navarro              | 12  | 5   | 7   | 35° 00' 12" S | 59° 16' 32" W  | 12                 | 6   | 6   | 1   |      |        |
| 6        | La plata             | 2   | 0   | 2   | 34° 55' 42" S | 57° 52' 37" W  | 2                  | 1   |     |     |      |        |
| 7        | Pipinas              | 9   | 4   | 5   | 35° 31' 57" S | 57° 19' 55" W  | 9                  | 4   | 5   | 1   | 1    | 1      |
| 8        | Tandil               | 20  | 10  | 10  | 37° 17' 02" S | 59° 14' 47" W  | 20                 | 10  | 10  |     |      |        |
| 9        | Gral. Madariaga      | 3   | 2   | 1   | 37° 06' 59" S | 57° 11' 29" W  | 3                  | 3   | 3   | 1   |      |        |
| 10       | Necochea             | 14  | 8   | 6   | 38° 31' 37" S | 58° 46' 44" W  | 14                 | 5   | 6   | 1   | 1    | 1      |
| 11       | Claromecó            | 10  | 3   | 7   | 38° 51' 06" S | 60° 4' 25" W   | 10                 | 3   | 5   | 1   | 1    | 1      |
| 12       | El remanso           | 1   | 0   | 1   | 36° 41' 34" S | 64° 11' 10" W  | 1                  | 1   | 1   | 1   |      |        |
| 13       | Gral. Paz            | 10  | 4   | 6   | 35° 23' 49" S | 58° 24' 45" W  | 10                 | 4   | 5   | 1   |      |        |
| 14       | Brandsen             | 9   | 5   | 4   | 35° 23' 49" S | 58° 24' 45" W  | 9                  | 3   | 4   | 1   |      |        |
| 15       | Pelegrini            | 7   | 3   | 4   | 36° 16' 05" S | 63° 9' 41" W   | 7                  | 4   | 3   | 1   |      |        |
| 16       | Medanos              | 8   | 5   | 3   | 38° 49' 42" S | 62° 41' 37" W  | 8                  | 4   | 3   | 1   | 1    | 1      |
| 17       | Trenel               | 33  | 17  | 16  | 35° 42' 00" S | 64° 7' 57" W   | 33                 | 10  | 10  | 2   |      |        |
| 18       | Campo de Angiono     | 27  | 13  | 14  | 36° 41' 34" S | 64° 11' 10" W  | 27                 | 10  | 10  | 2   |      |        |
| 19       | Jacinto Arauz        | 34  | 14  | 20  | 38° 05' 00" S | 63° 25' 41" W  | 34                 | 18  | 19  | 2   | 2    | 2      |
| 20       | Campo de Caballero   | 2   | 0   | 2   | 36° 41' 34" S | 64° 11' 10" W  | 2                  | 2   | 2   | 1   |      |        |
| 21       | Santa Rosa           | 1   | 1   | 0   | 36° 34' 45" S | 64° 13' 51" W  | 1                  | 1   | 1   | 1   |      |        |
| 22       | General Acha         | 8   | 3   | 5   | 37° 22' 34" S | 64° 36' 00" W  | 8                  | 3   | 4   |     |      |        |
| 23       | Int. Alvear          | 13  | 5   | 8   | 35° 14' 11" S | 63° 35' 26" W  | 13                 | 6   | 7   | 1   |      |        |
| 24       | Olivieri             | 1   | 1   | 0   | 36° 41' 34" S | 64° 11' 10" W  | 1                  | 1   | 1   | 1   |      |        |
| 25       | Irupe                | 18  | 18  | 0   | 36° 41' 34" S | 64° 11' 10" W  | 18                 | 9   | 9   | 1   |      |        |
| 26       | El Cipres            | 12  | 12  | 0   | 36° 51' 41" S | 64° 29' 16" W  | 12                 | 2   | 2   |     |      |        |
| 27       | Arca de Noe          | 8   | 8   | 0   | 36° 47' 37" S | 64° 10' 03" W  | 8                  | 4   | 4   | 1   |      |        |
| 28       | El bajo              | 1   | 1   | 0   | 36° 46' 21" S | 64° 08' 03" W  | 1                  | 1   | 1   | 1   |      |        |
| 29       | El coraje            | 3   | 3   | 0   | 36° 46' 18" S | 64° 06' 54" W  | 3                  | 2   | 2   | 1   |      |        |
| 30       | Ingeniero Luiggi     | 13  | 8   | 5   | 35° 23' 09" S | 64° 28' 03" W  | 13                 | 6   | 3   | 1   |      |        |
| 31       | Santo Domingo        | 2   | 1   | 1   | 30° 28' 59" S | 65° 03' 00" W  | 2                  | 2   | 2   | 2   |      |        |
| 32       | Los hormigueros      | 1   | 1   | 0   | 32° 03' 06" S | 63° 33' 18" W  | 1                  | 1   | 1   |     |      |        |
| 33       | Estancia 11 de junio | 4   | 2   | 2   | 34° 12' 35" S | 65° 59' 16" W  | 4                  | 2   | 2   |     |      |        |
| 34       | S. Pedro de Guasayan | 2   | 1   | 1   | 27° 06' 00" S | 64° 17' 00" W  | 2                  | 2   | 1   |     |      |        |
| 35       | Aguilares            | 2   | 1   | 1   | 27° 25' 58" S | 65° 36' 57" W  | 2                  | 2   | 2   |     |      |        |
| 36       | Roque Saenz Peña     | 4   | 4   | 0   | 26° 47' 31" S | 60° 26' 15" W  | 4                  | 4   | 4   | 1   |      |        |
| 38       | La Salvación         | 1   | 0   | 1   | 25° 28' 18" S | 57° 50' 0,7" W | 1                  | 1   | 1   |     |      |        |
| 39       | Cerro de la Gloria   | 1   | 0   | 1   | 32° 53' 19" S | 68° 53' 09" W  | 1                  |     | 1   |     |      |        |
| 40       | Tierra del fuego     | 3   | 1   | 2   | 53° 34' 04" S | 68° 23' 46" W  | 3                  | 3   | 3   |     |      |        |
| 41       | Neuquen              | 2   | 0   | 2   | 38° 56' 49" S | 67° 56' 45" W  | 2                  | 1   | 2   | 1   |      |        |
| 42       | Cipolletti           | 6   | 2   | 4   | 38° 54' 58" S | 68° 00' 20" W  | 6                  | 3   | 3   | 1   |      |        |
| Total    |                      | 421 | 233 | 188 |               |                | 421                | 194 | 200 | 46  | 10   | 10     |

\*SCs: Sinaptonemal complexes
